# Supplementary material
Source: PubMed Central journal article supplement (PMC2773093)
Supplement: pp.109.144766_1.pdf [file pp.109.144766_1.pdf]

Figure S1

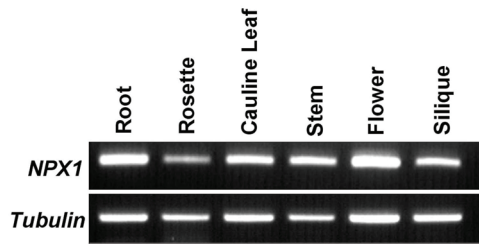

**Supplemental Figure S1.** RT-PCR analysis of *NPX1* expression in *Arabidopsis* plants. Tissues analyzed were roots, rosette leaf, cauline leaf, stem, flower and developing siliques of 3-week-old *Arabidopsis* plants grown at 22°C with a 16 h daylength. RT-PCR analysis of *NPX1* expression was performed with *NPX1*  $\beta$ -tubulin gene (At5g62690) specific primers. Amplification was performed as follows: 30 s at 94°C, 30 s at 55°C, and 45 s at 72°C for 30 cycles, followed by a 10 min extension at 72°C.

Figure S2

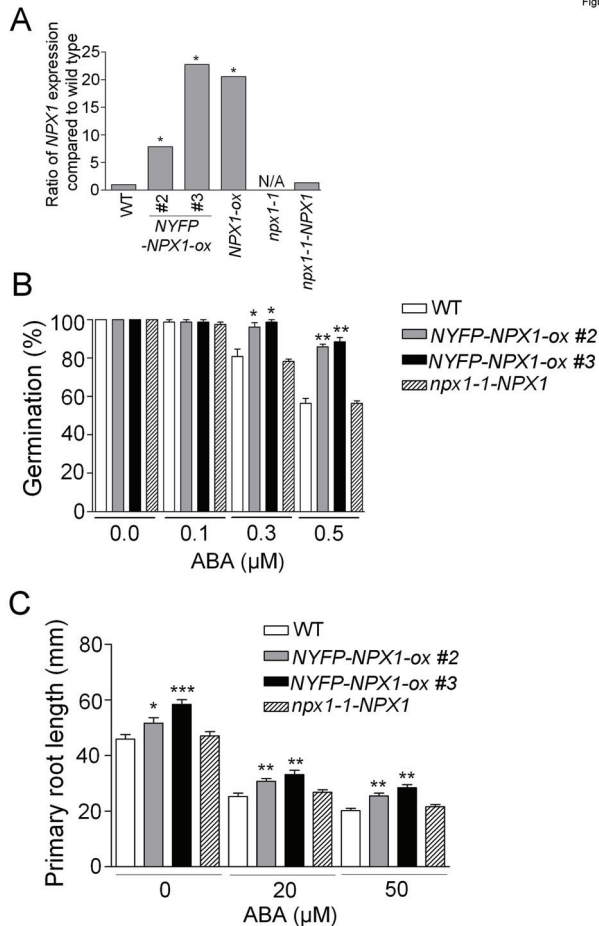

**Supplemental Figure S2. Analysis of additional NPX overexpression and knockout lines.** A, Quantitative Real-time PCR analysis of *NPX1* expression in wild-type, two NYFP-*NPX1-ox*, *NPX1-ox*, *npx1-1* and *npx1-1-NPX1*. B, The effect of ABA on germination rates of wild-type, two NYFP-*NPX1-ox* and *npx1-1-NPX1* 5 d after germination. Data represent the mean  $\pm$  standard deviation of 52 seeds per genotype. C, Comparison of root elongation of wild-type, two NYFP-*NPX1-ox* and *npx1-1-NPX1* seedlings; 6-d-old seedlings were transferred to plates supplemented with ABA, and root elongation was measured after 6 d. Each data point represents the mean  $\pm$  standard deviation ( $n = 40$ ). Asterisks indicate a significant difference between wild-type and NYFP-*NPX1-ox* or *npx1-1-NPX1* plants (\*:  $P < 0.05$ ; \*\*:  $P < 0.01$ ; \*\*\*:  $P < 0.001$ ). These data provide additional genetic evidence for the involvement of NPX1 in ABA sensitivity.

Figure S3

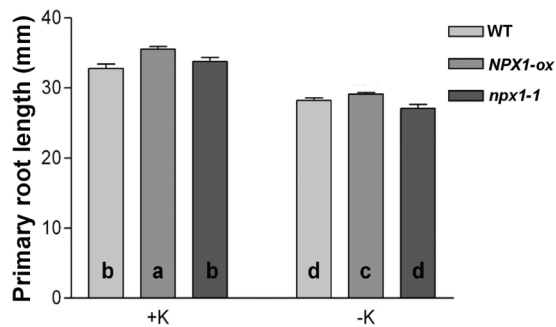

**Supplemental Figure S3. Overexpression of *NPX1* enhances primary root growth.**

+K indicates full nutrients and -K indicates full nutrients with limiting 10  $\mu\text{M}$   $\text{K}^+$ . Bars represent standard errors. Different letters indicates a significant difference between means at  $P < 0.05$  (TUKEY HSD) ( $n \geq 70$  plants).

A

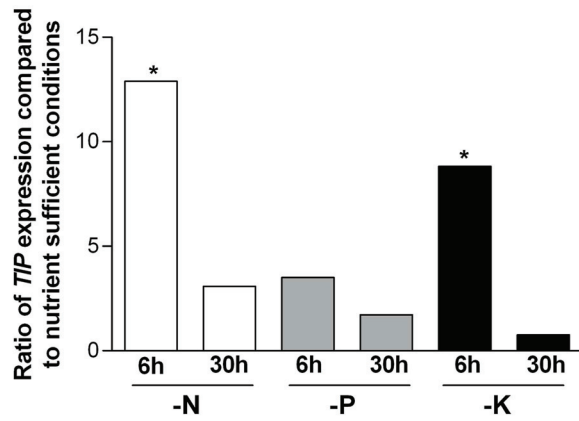

B

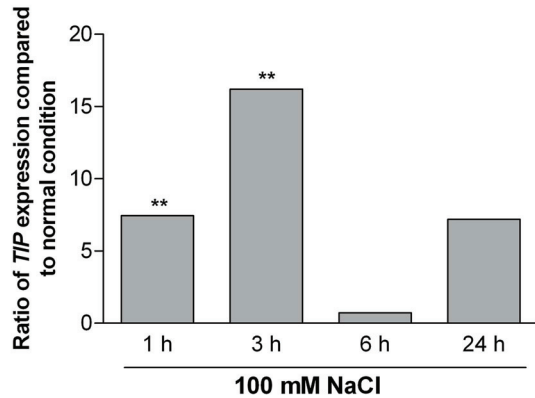

C

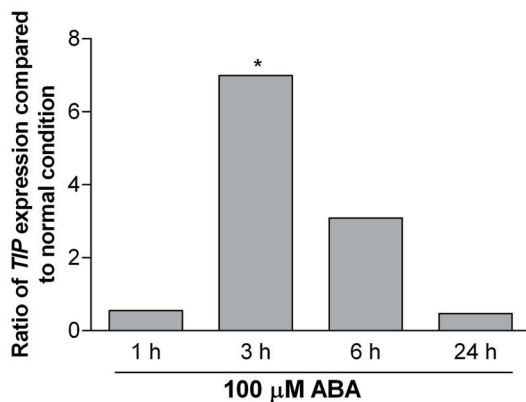

**Supplemental Figure S4.** The expression of *TIP* was up-regulated by nutrient deprivation and abiotic stresses. A-C, Quantitative real-time PCR analysis of *TIP* under nutrient deprived, NaCl and ABA treatment expressed in relation to control conditions. A, *Arabidopsis* Col-0 roots: grown under full nutrient conditions; K<sup>+</sup> deficiency (-K); N

deficiency (-N) and P deficiency (-P). B and C, Expression of *TIP* after treatment with 100 mM NaCl (B), or 100  $\mu$ M ABA for 1, 3, 6 and 24 h (C). Data are the mean of three biological replicates. Asterisks indicate a significant change (\*:  $P < 0.05$ ; \*\*:  $P < 0.01$ ; Student's t-test).

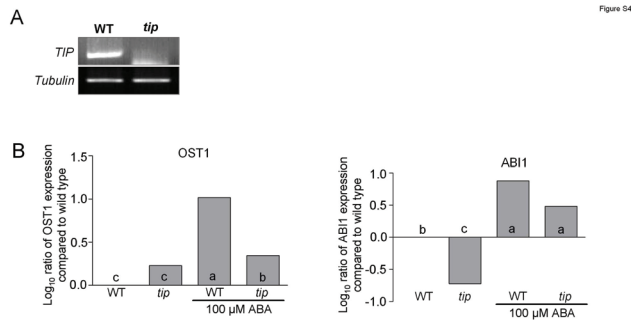

**Supplemental Figure S5.** Disruption of *TIP* alters the expression of ABA-signaling genes. A, RT-PCR analysis of *TIP* expression in wild-type and *tip* plants after 100  $\mu$ M ABA treatment. B, Quantitative real-time PCR analysis of *OST1* and *ABI1* expression in wild-type and *tip* before and after 100  $\mu$ M ABA treatment. Different letters indicate a significant difference between means at  $P < 0.05$  (Student's t-test).

**Table S1. Proteins that interact with NPX1 as determined by yeast two hybrid screening**

| # of clone | Locus                            | Description                                                             | $\beta$ -galactosidase activity <sup>b</sup> | Gene expression after ABA treatment <sup>c</sup> | Cellular localization <sup>d</sup>      |
|------------|----------------------------------|-------------------------------------------------------------------------|----------------------------------------------|--------------------------------------------------|-----------------------------------------|
| 1          | At5g42530                        | unknown protein                                                         | 56.6 $\pm$ 11.2                              | N/A                                              | endomembrane                            |
| 2          | At5g39320                        | UDP-glucose 6-dehydrogenase, putative                                   | 70.0 $\pm$ 9.2                               | no change                                        | cytosol/nucleus                         |
| 3          | At4g30220                        | RUXF (Small nuclear ribonucleoprotein F)                                | 61.9 $\pm$ 7.7                               | no change                                        | nucleus                                 |
| 4          | <b>At5g44130</b>                 | <b>FLA13 (Fasciclin-like arabinogalactan protein 13 precursor)</b>      | <b>55.8 <math>\pm</math> 9.6</b>             | <b>down</b>                                      | <b>cell wall</b>                        |
| 7          | At5g08520                        | MYB family transcription factor                                         | 68.2 $\pm$ 8.5                               | no change                                        | nucleus                                 |
| 8          | <b>At1g01620</b>                 | <b>PIP1;3 (Plasma membrane intrinsic protein 1;3)</b>                   | <b>83.1 <math>\pm</math> 19.4</b>            | <b>up</b>                                        | <b>plasma membrane</b>                  |
| 9          | <b>At1g17745 (2)<sup>a</sup></b> | <b>3-Phosphoglycerate dehydrogenase</b>                                 | <b>69.1 <math>\pm</math> 20.0</b>            | <b>up</b>                                        | <b>chloroplast/<br/>cytosol/nucleus</b> |
| 19         | <b>At3g06390 (2)</b>             | <b>integral membrane family protein</b>                                 | <b>149.6 <math>\pm</math> 35.6</b>           | <b>up</b>                                        | <b>N/A</b>                              |
| 24         | At2g32487                        | unknown protein                                                         | 153.6 $\pm$ 19.1                             | N/A                                              | endomembrane                            |
| 26         | At1g60989                        | SCR (S locus cysteine-rich protein) similar                             | 150.6 $\pm$ 7.1                              | no change                                        | endomembrane                            |
| 27         | <b>At5g27450</b>                 | <b>Mevalonate kinase</b>                                                | <b>127.2 <math>\pm</math> 12.2</b>           | <b>down</b>                                      | <b>cytosol</b>                          |
| 28         | <b>At4g11280</b>                 | <b>a member of the 1-aminocyclopropane-1-carboxylate (ACC) synthase</b> | <b>94.7 <math>\pm</math> 15.2</b>            | <b>up</b>                                        | <b>N/A</b>                              |
| 29         | <b>At4g12420</b>                 | <b>SKU5</b>                                                             | <b>123.2 <math>\pm</math> 10.5</b>           | <b>down</b>                                      | <b>cell wall/plasma<br/>membrane</b>    |
| 32         | <b>At4g13940 (2)</b>             | <b>SAHH1(S-adenosyl-L-homocysteine hydrolase)</b>                       | <b>92.6 <math>\pm</math> 21.7</b>            | <b>down</b>                                      | <b>membrane/<br/>vacuole</b>            |
| 39         | <b>At1g60950</b>                 | <b>Ferredoxin 2</b>                                                     | <b>120.3 <math>\pm</math> 25.4</b>           | <b>down</b>                                      | <b>chloroplast</b>                      |
| 40         | <b>At5g24590</b>                 | <b>TIP (TCV-interacting protein)</b>                                    | <b>54.3 <math>\pm</math> 9.7</b>             | <b>up</b>                                        | <b>nucleus</b>                          |
| 41         | <b>At4g39260</b>                 | <b>GRP8 (Glycine rich protein 8)</b>                                    | <b>77.0 <math>\pm</math> 25.0</b>            | <b>down</b>                                      | <b>peroxisome</b>                       |

<sup>a</sup> Selected repeatedly in the yeast two-hybrid screen

<sup>b</sup> The liquid culture assay using o-nitrophenyl- $\beta$ -D-galactopyranoside as substrate

<sup>c</sup> Determined by the AtGenExpress Database (Arabidopsis eFP Browser)

<sup>d</sup> Determined by the TAIR Database

N/A-not available

**Supplemental Table S1.** Proteins that interact with NPX1 as determined by yeast two hybrid screening.

**Table S2. Gene information used for real-time PCR analysis**

| Gene name | Locus     | Description                                                                                                                                                                                                 |
|-----------|-----------|-------------------------------------------------------------------------------------------------------------------------------------------------------------------------------------------------------------|
| AREB1     | At1g45249 | ABSCISIC ACID RESPONSIVE ELEMENTS-BINDING FACTOR 2; Leucine zipper transcription factor that binds to the abscisic acid (ABA)-responsive element (ABRE) motif in the promoter region of ABA-inducible genes |
| MYC2      | At1g32640 | Encodes a MYC-related transcriptional activator with a typical DNA binding domain of a basic helix-loop-helix leucine zipper motif                                                                          |
| MYB2      | At2g47190 | Encodes a MYB transcription factor that possesses an R2R3 MYB DNA binding domain and is known to regulate the expression of salt- and dehydration-responsive genes                                          |
| RD29A     | At5g52310 | RESPONSIVE TO DESSICATION 29A; Cold regulated gene, the 5' region of cor78 has cis-acting regulatory elements that can impart cold-regulated gene expression                                                |
| ABI1      | At4g26080 | ABA INSENSITIVE 1; Involved in abscisic acid (ABA) signal transduction                                                                                                                                      |
| ABI2      | At5g57050 | ABA INSENSITIVE 2; Encodes a protein phosphatase 2C and is involved in ABA signal transduction                                                                                                              |
| AtrbohD   | At5g47910 | ARABIDOPSIS THALIANA RESPIRATORY BURST OXIDASE HOMOLOGUE D;NADPH/respiratory burst oxidase protein D                                                                                                        |
| AtrbohF   | At1g64060 | ARABIDOPSIS THALIANA RESPIRATORY BURST OXIDASE HOMOLOG F; Interacts with AtrbohD gene to fine tune the spatial control of ROI production and hypersensitive response to cell in and around infection site   |
| OST1      | At4g33950 | OPEN STOMATA 1; Encodes calcium-independent ABA-activated protein kinase                                                                                                                                    |
| NCED3     | At3g14440 | NINE-CIS-EPOXYCAROTENOID DIOXYGENASE 3; Encodes 9-cis-epoxycarotenoid dioxygenase, a key enzyme in the biosynthesis of abscisic acid                                                                        |
| ABA2      | At1g52340 | ARABIDOPSIS THALIANA ABA DEFICIENT 2; Encodes a cytosolic short-chain dehydrogenase/reductase involved in the conversion of xanthoxin to ABA-aldehyde during ABA biosynthesis                               |

**Supplemental Table S2.** Information on Genes used for real-time PCR analysis.
